# Supplementary material for: Soluble collectin-12 mediates C3-independent docking of properdin that activates the alternative pathway of complement
Source: eLife journal article supplement (doi:10.7554/elife.60908), 2020-09-10
Supplement: supp [file elife-60908-supp-v1.zip]

Archive with 6 entries (6 files):
- elife_poa_e60908_Transparent_Reporting_File.pdf
- elife_poa_e60908_Figure_4_figure_supplement_1.tif
- elife_poa_e60908_Figure_4_figure_supplement_2.tif
- elife_poa_e60908_Figure_4_figure_supplement_3.tif
- elife_poa_e60908_Figure_5_figure_supplement_1.tif
- elife_poa_e60908_Figure_6_figure_supplement_1.tif
