# Supplementary figures and images for: Soluble collectin-12 mediates C3-independent docking of properdin that activates the alternative pathway of complement
Source: eLife journal article supplement (doi:10.7554/elife.60908), 2020-09-10

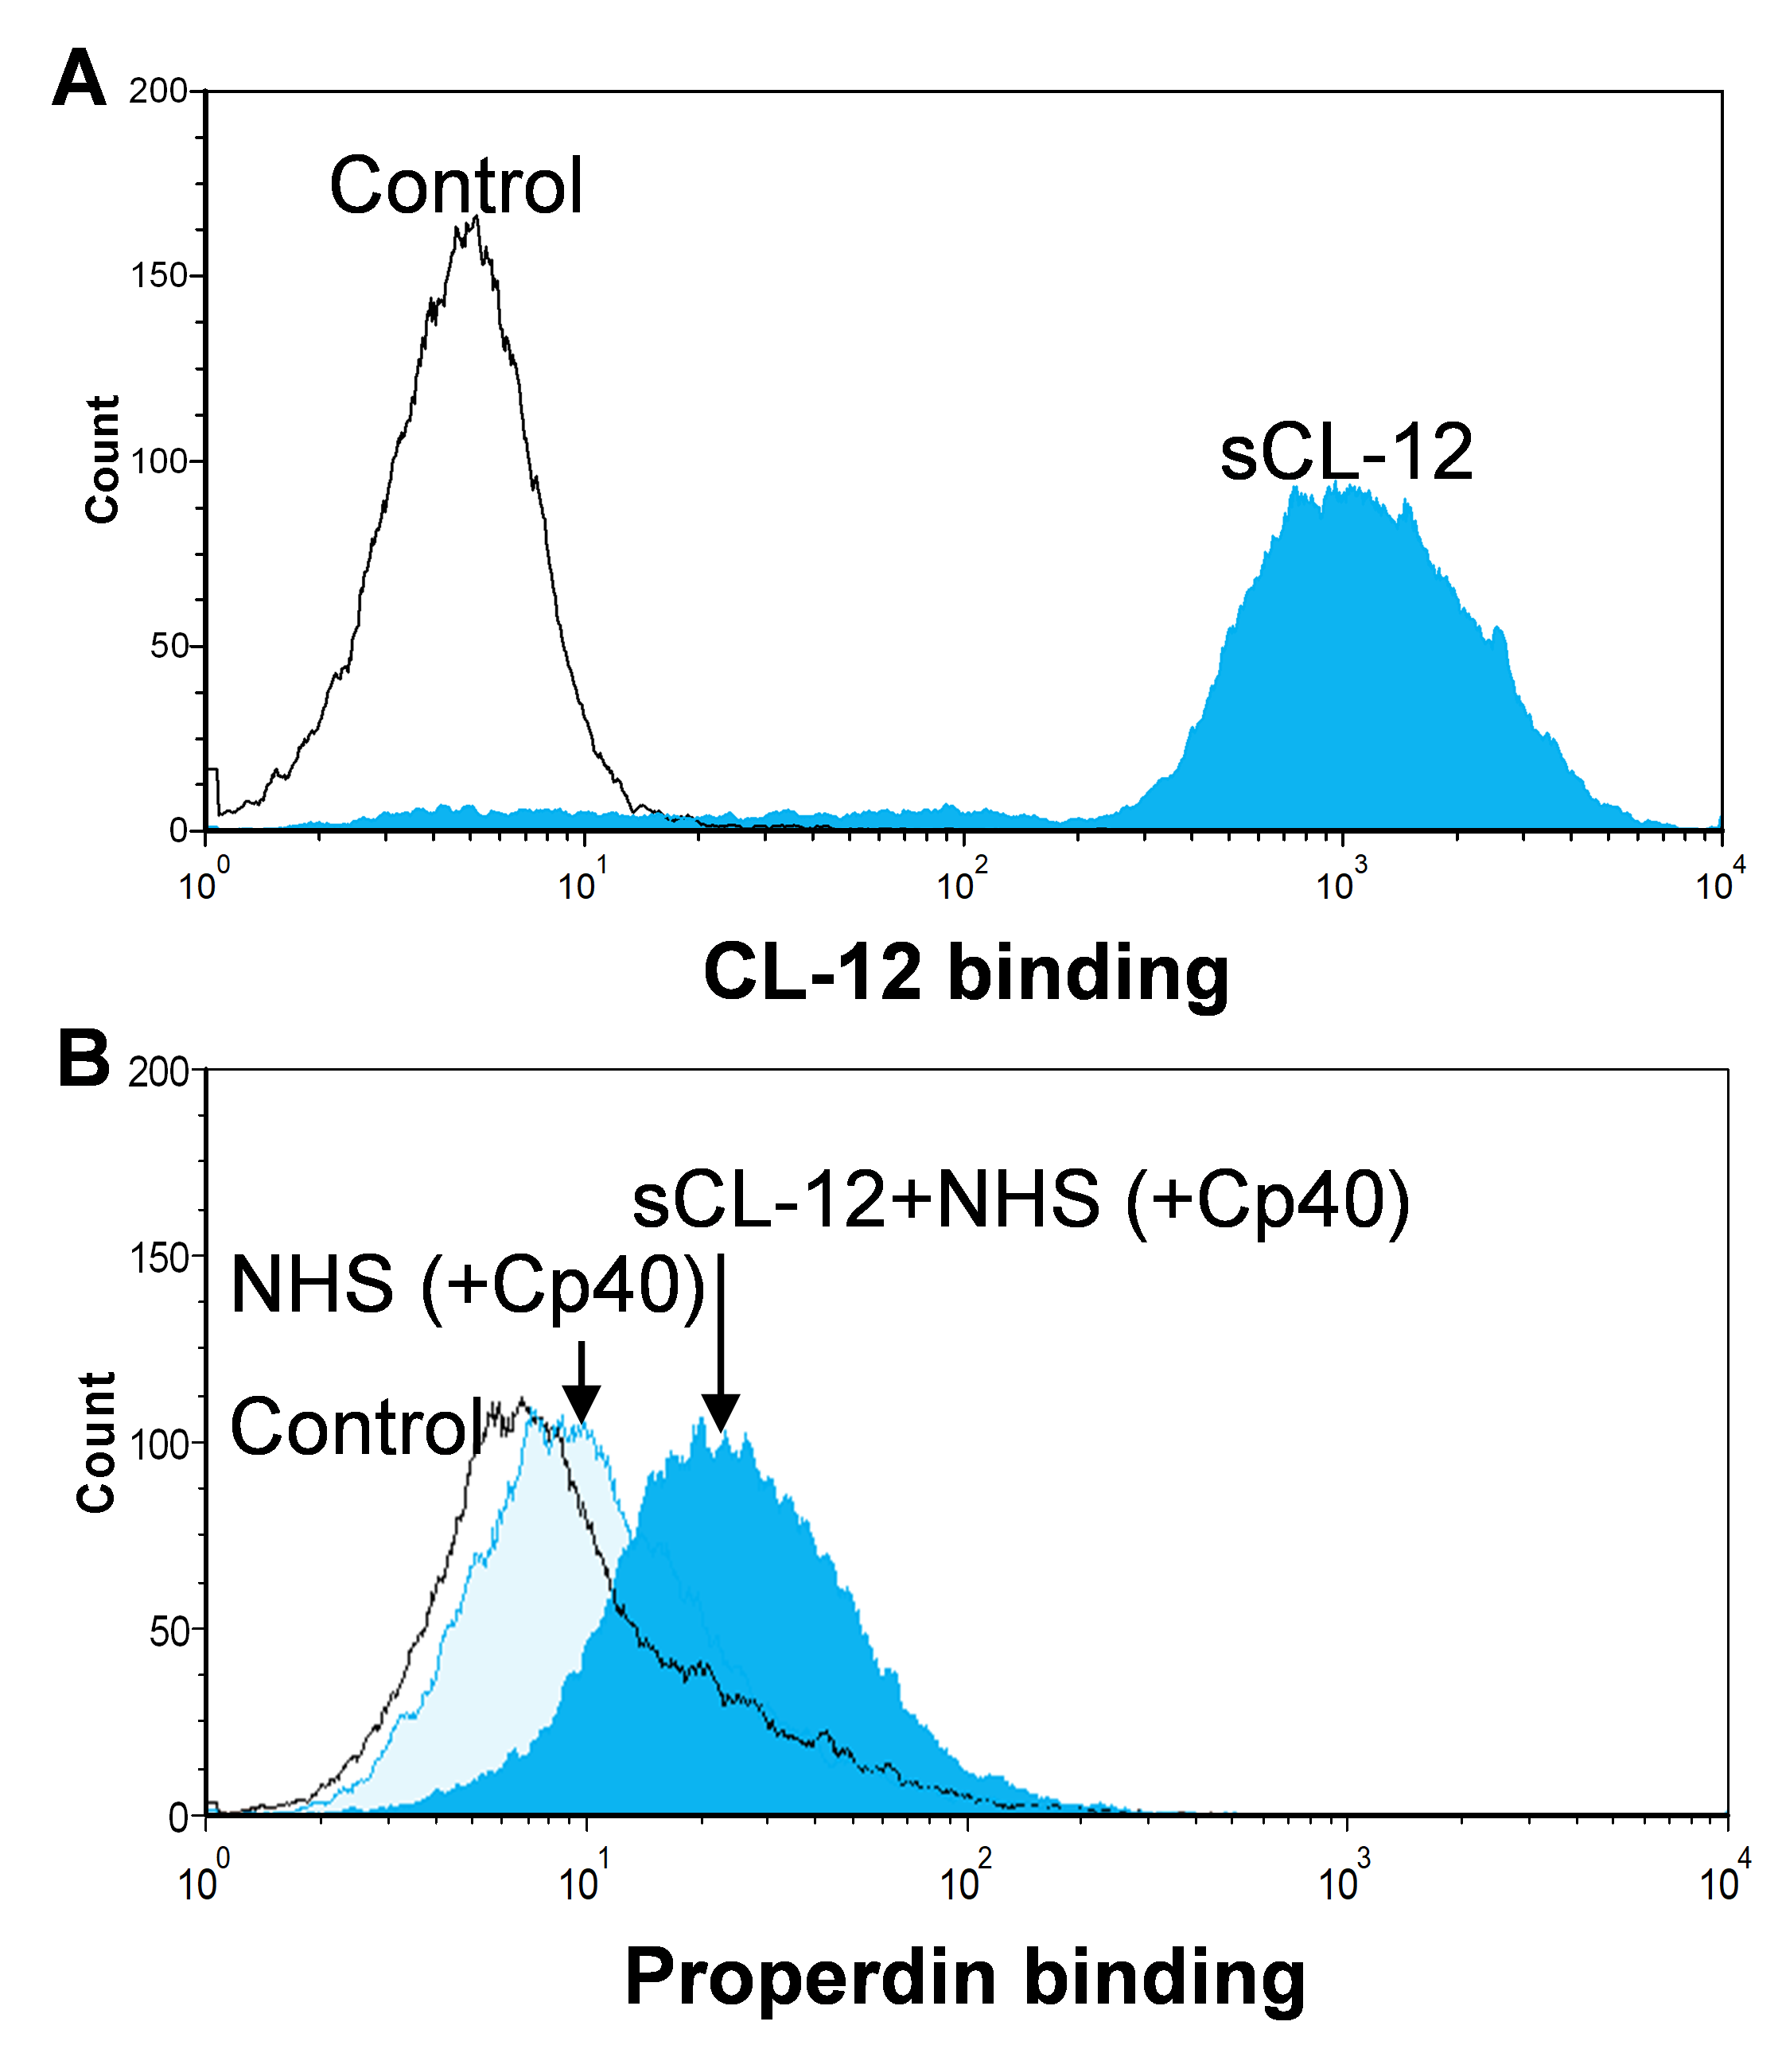

Supplement: supp [file elife-60908-supp-v1.zip › elife_poa_e60908_Figure_4_figure_supplement_1.tif]

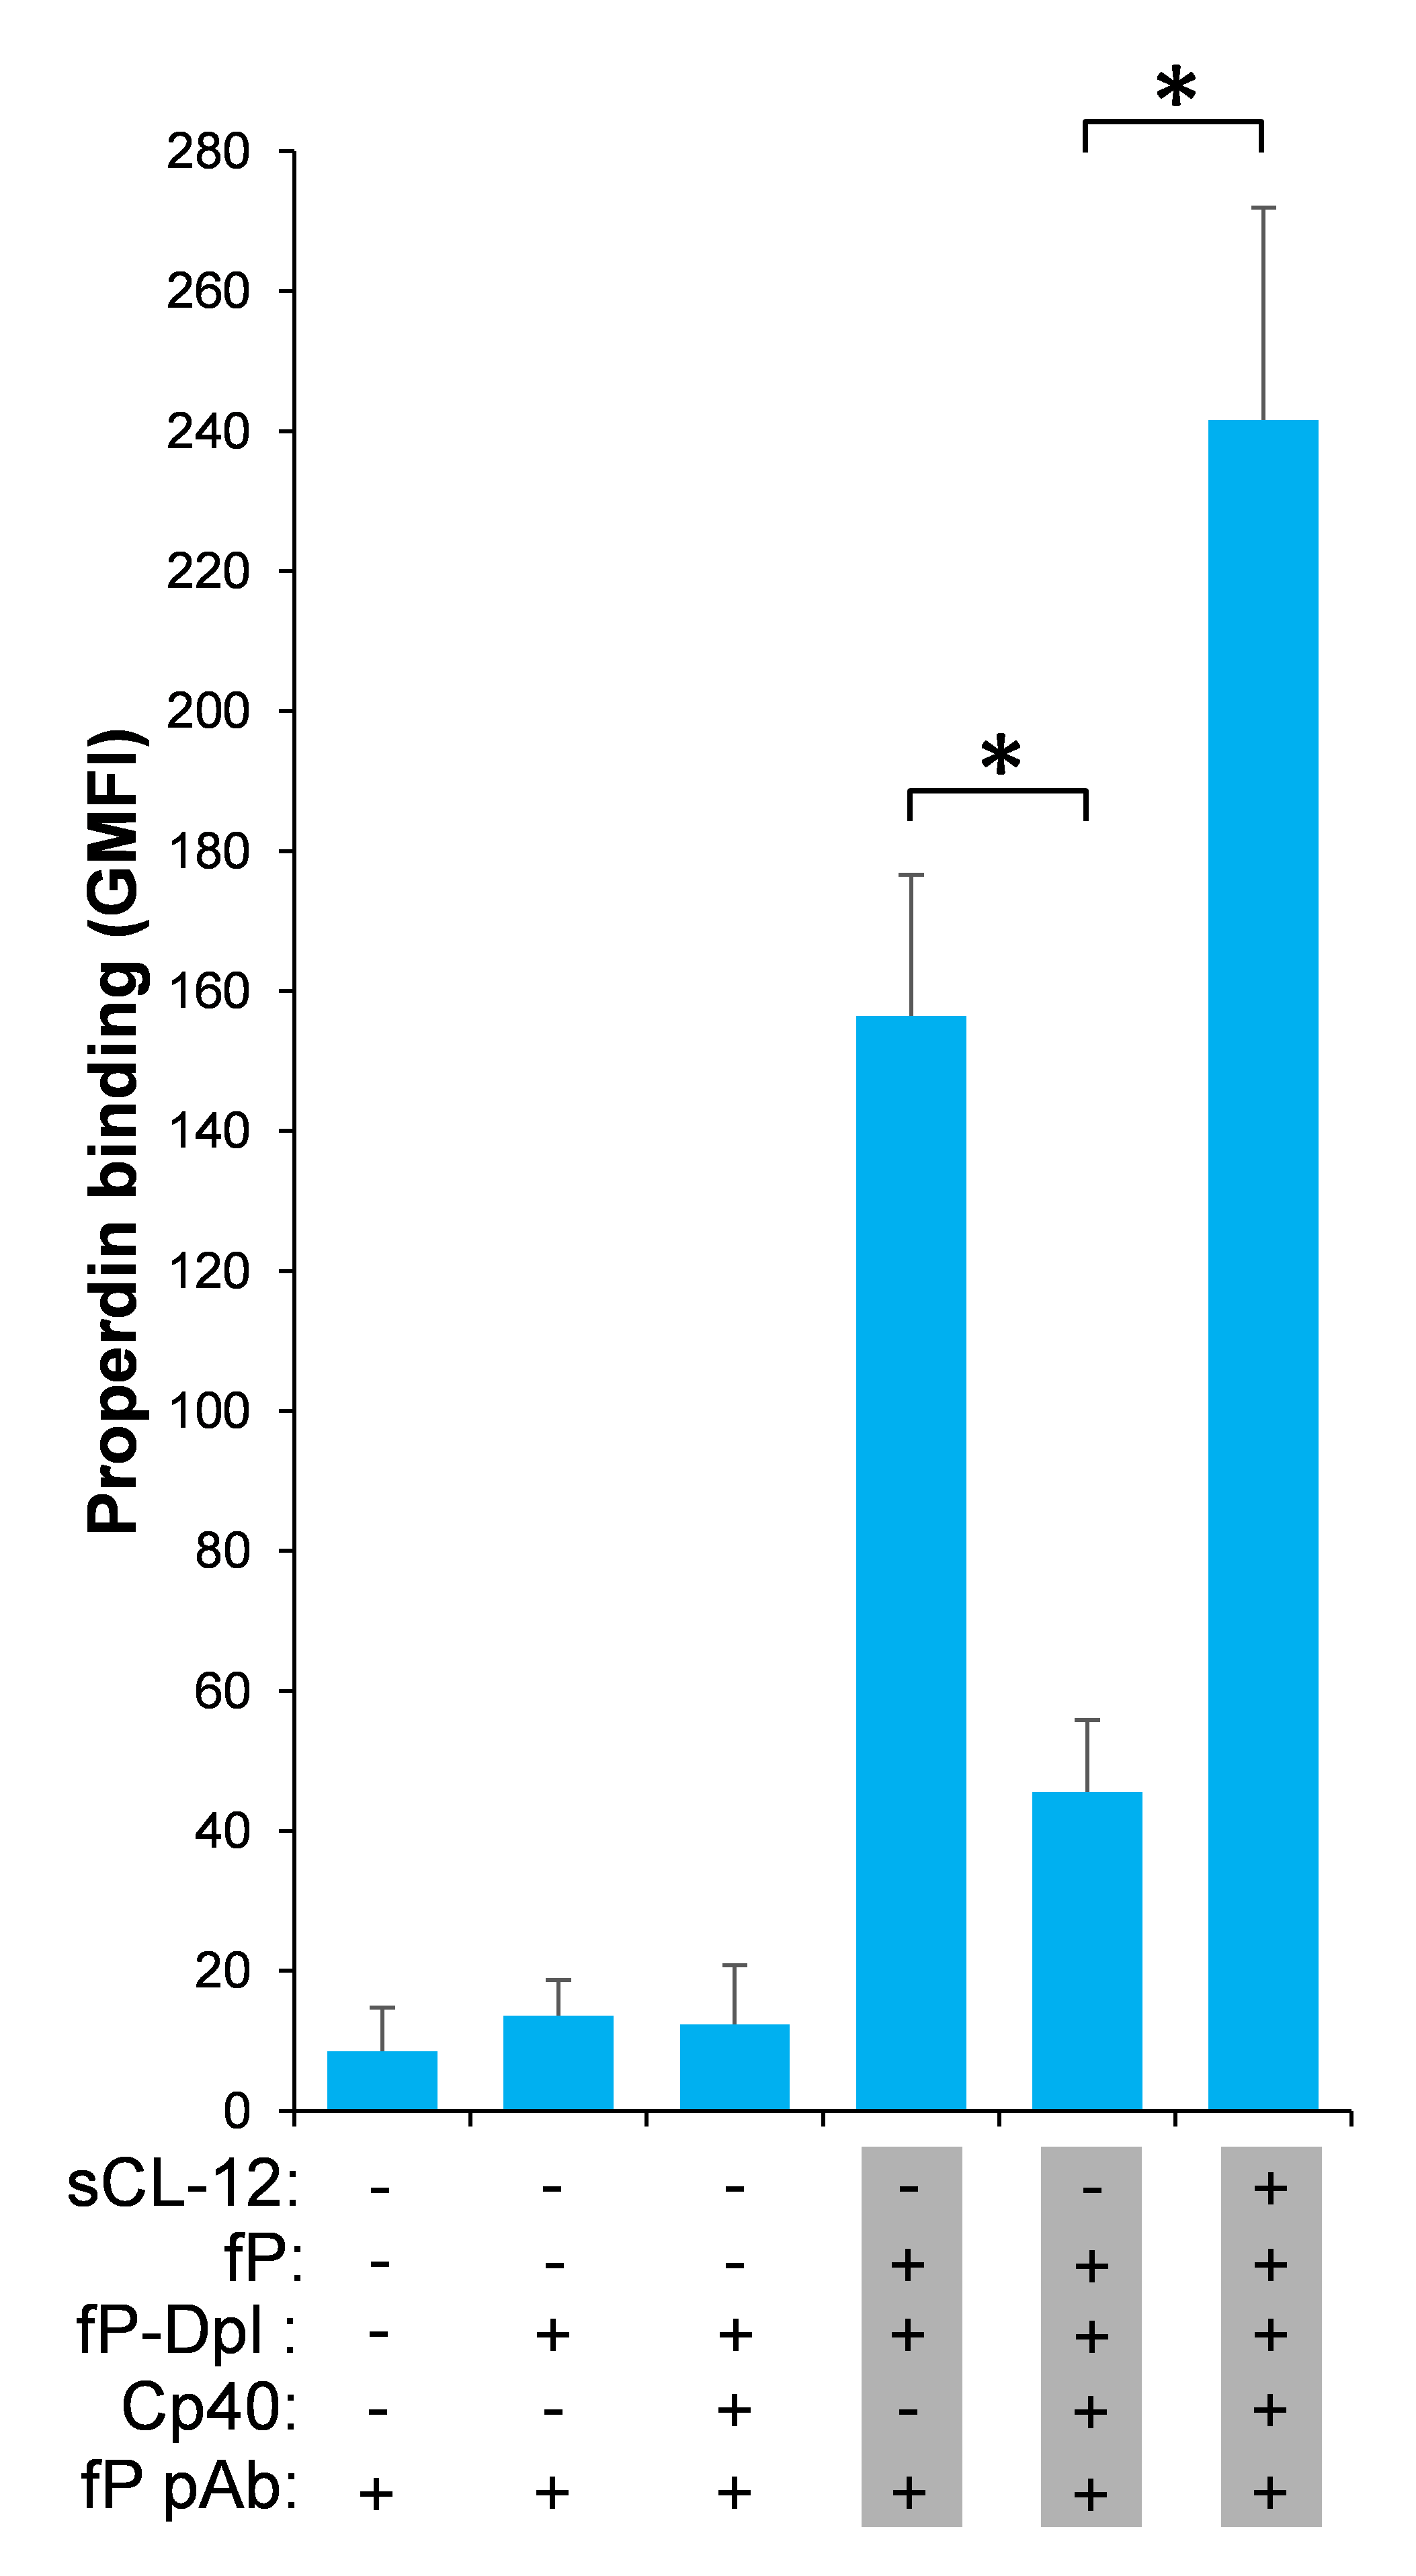

Supplement: supp [file elife-60908-supp-v1.zip › elife_poa_e60908_Figure_4_figure_supplement_2.tif]

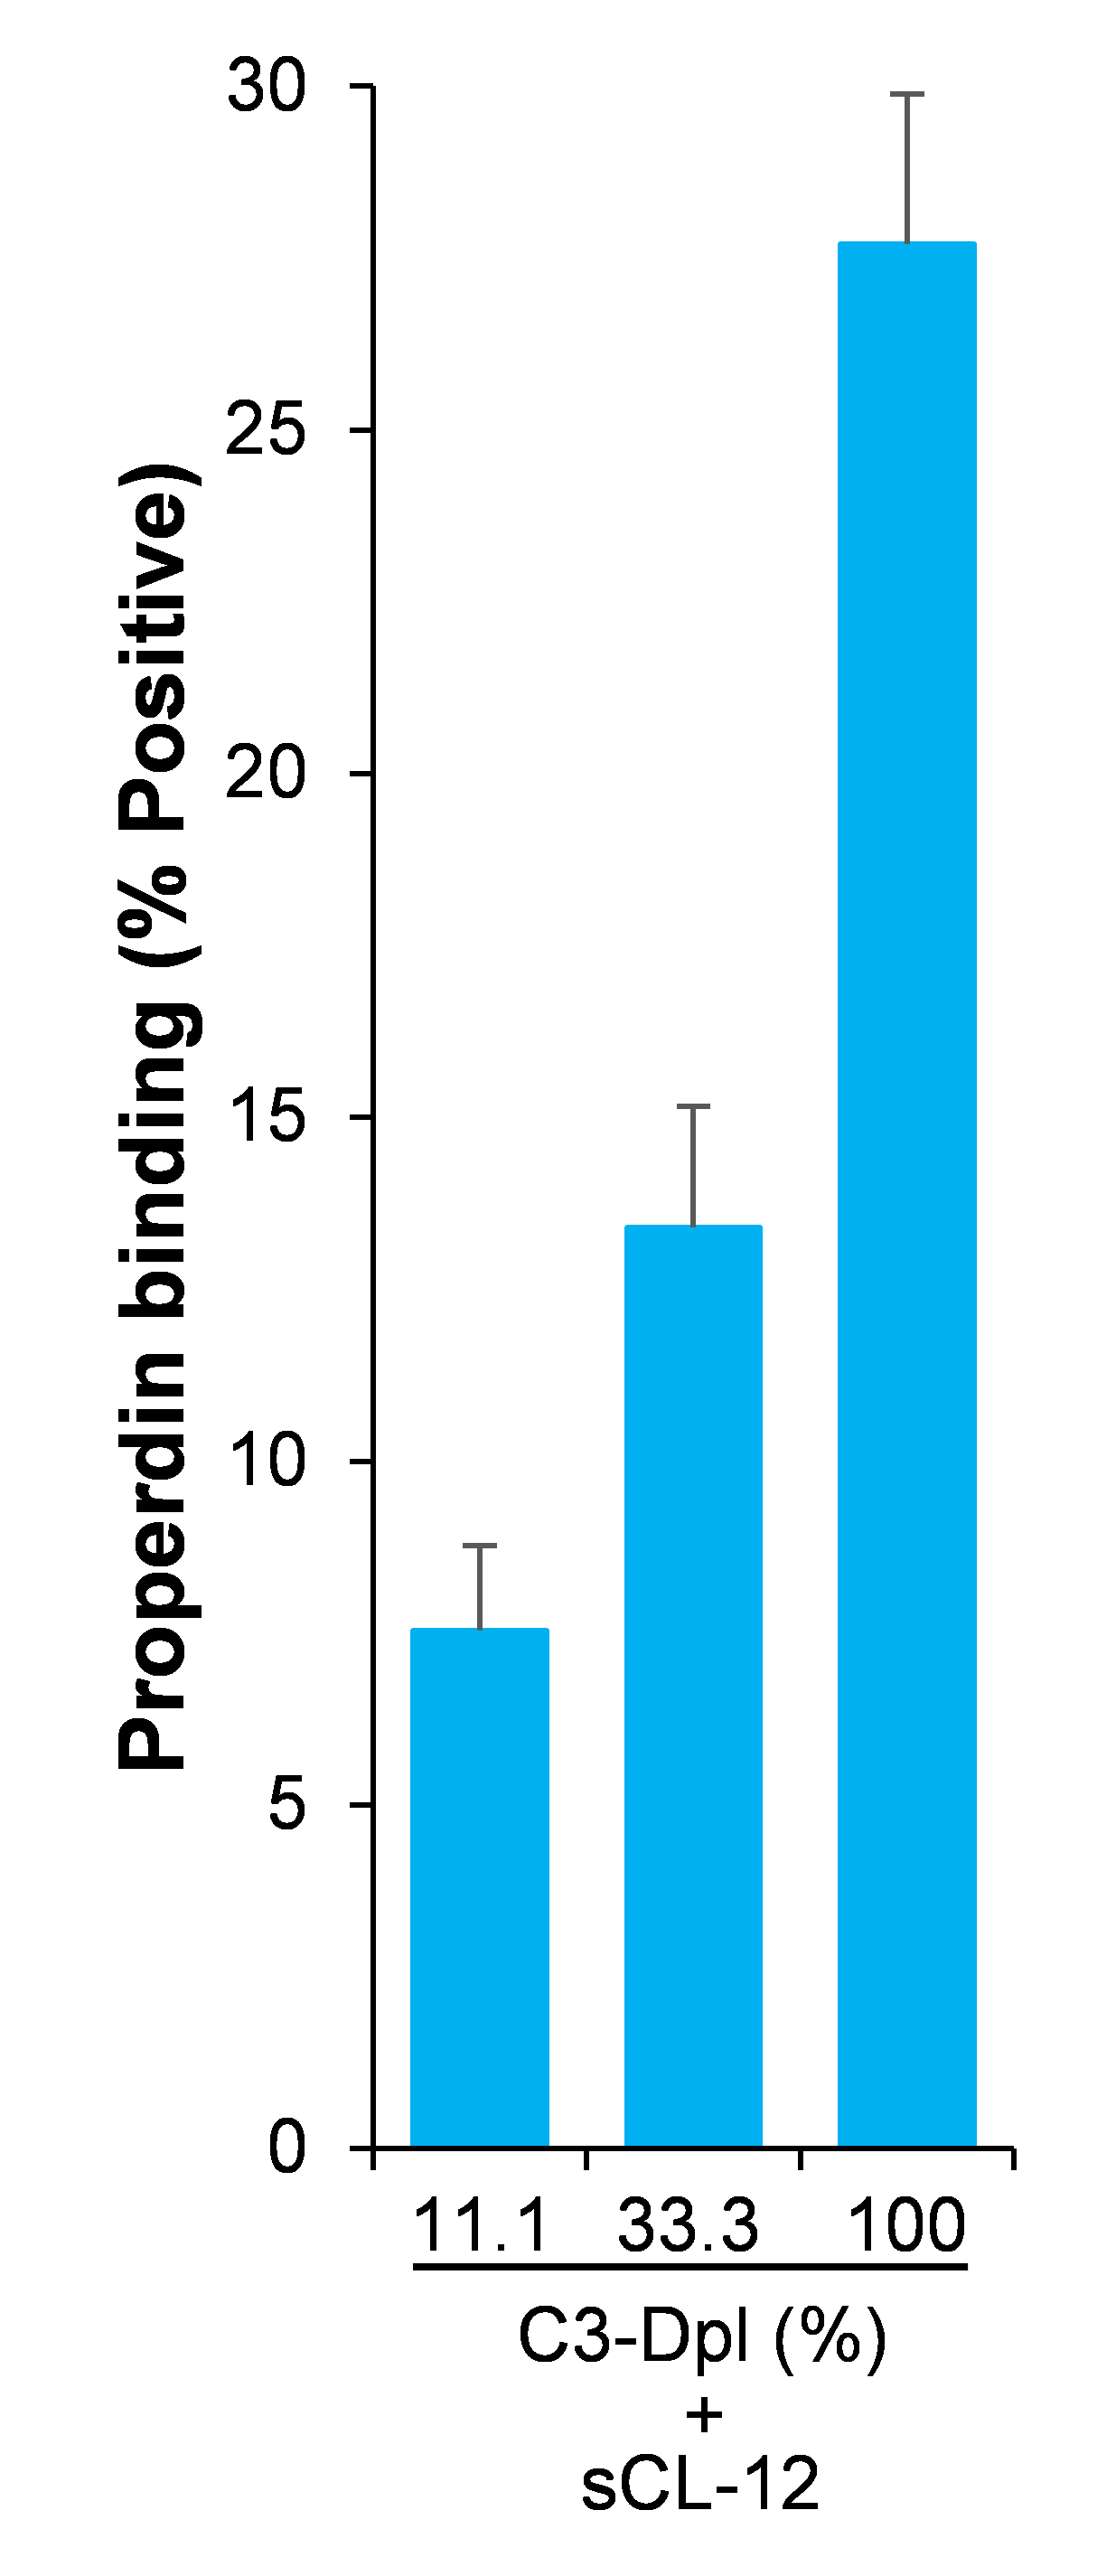

Supplement: supp [file elife-60908-supp-v1.zip › elife_poa_e60908_Figure_4_figure_supplement_3.tif]

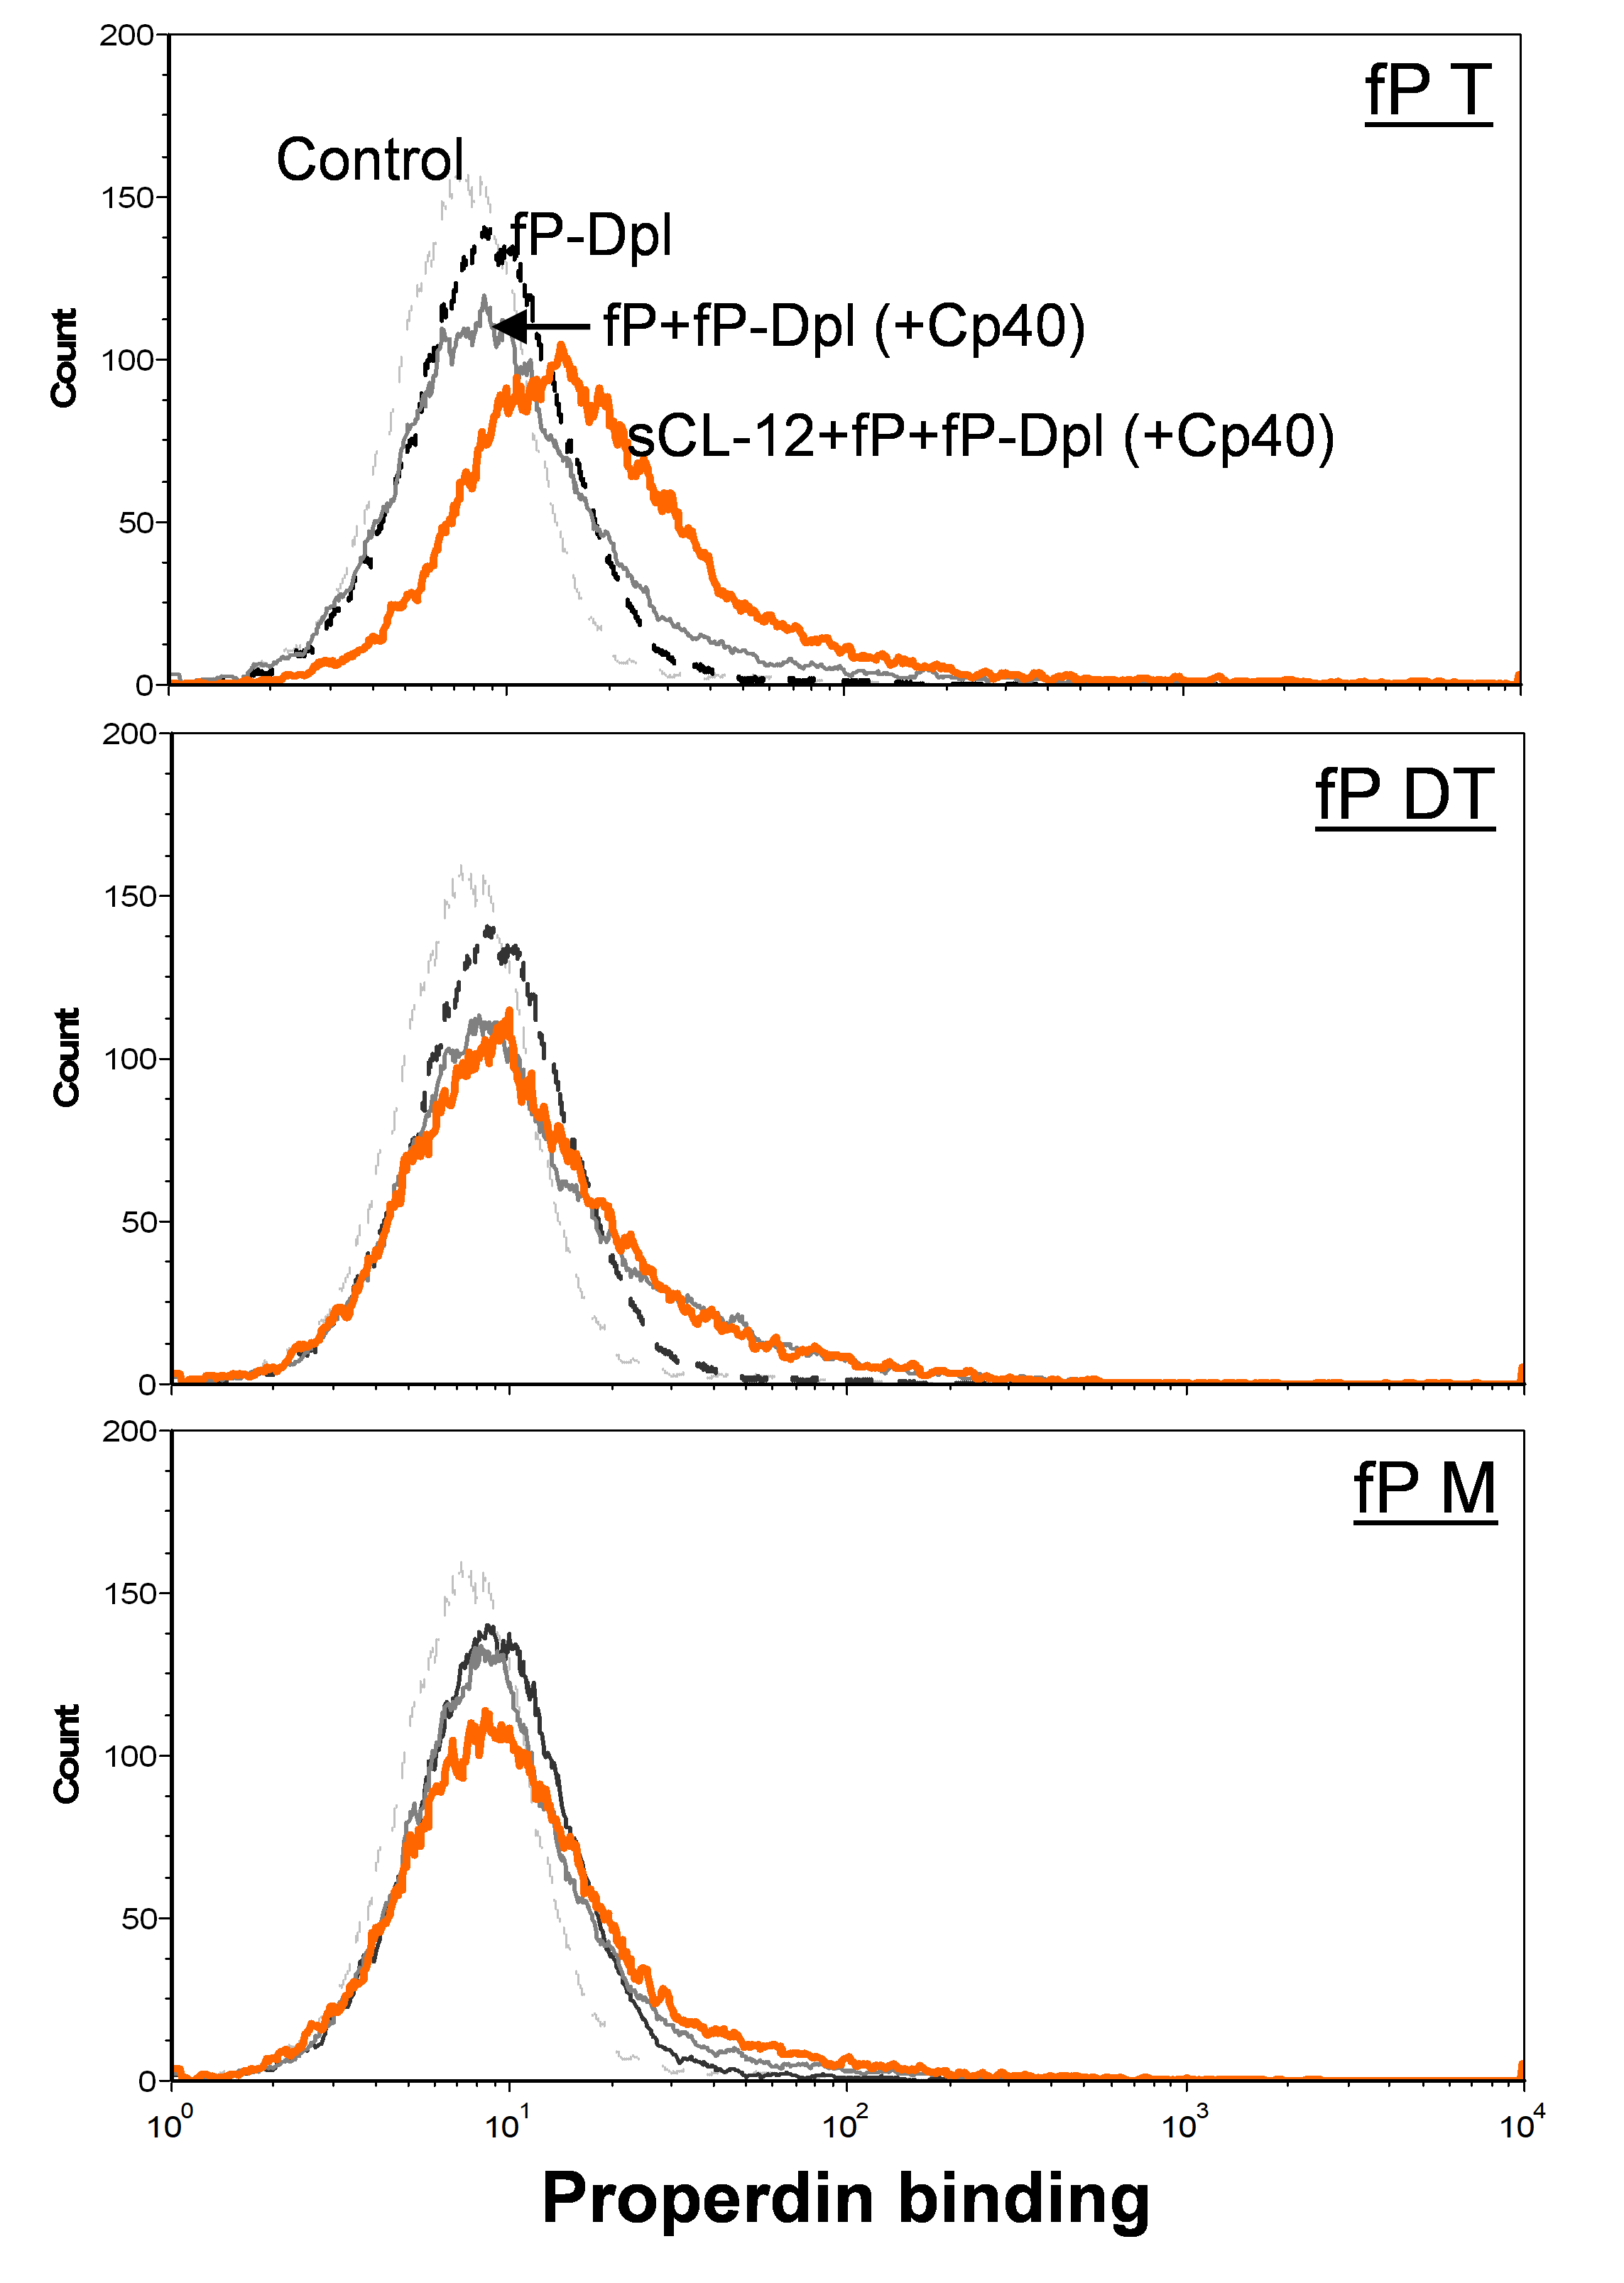

Supplement: supp [file elife-60908-supp-v1.zip › elife_poa_e60908_Figure_5_figure_supplement_1.tif]

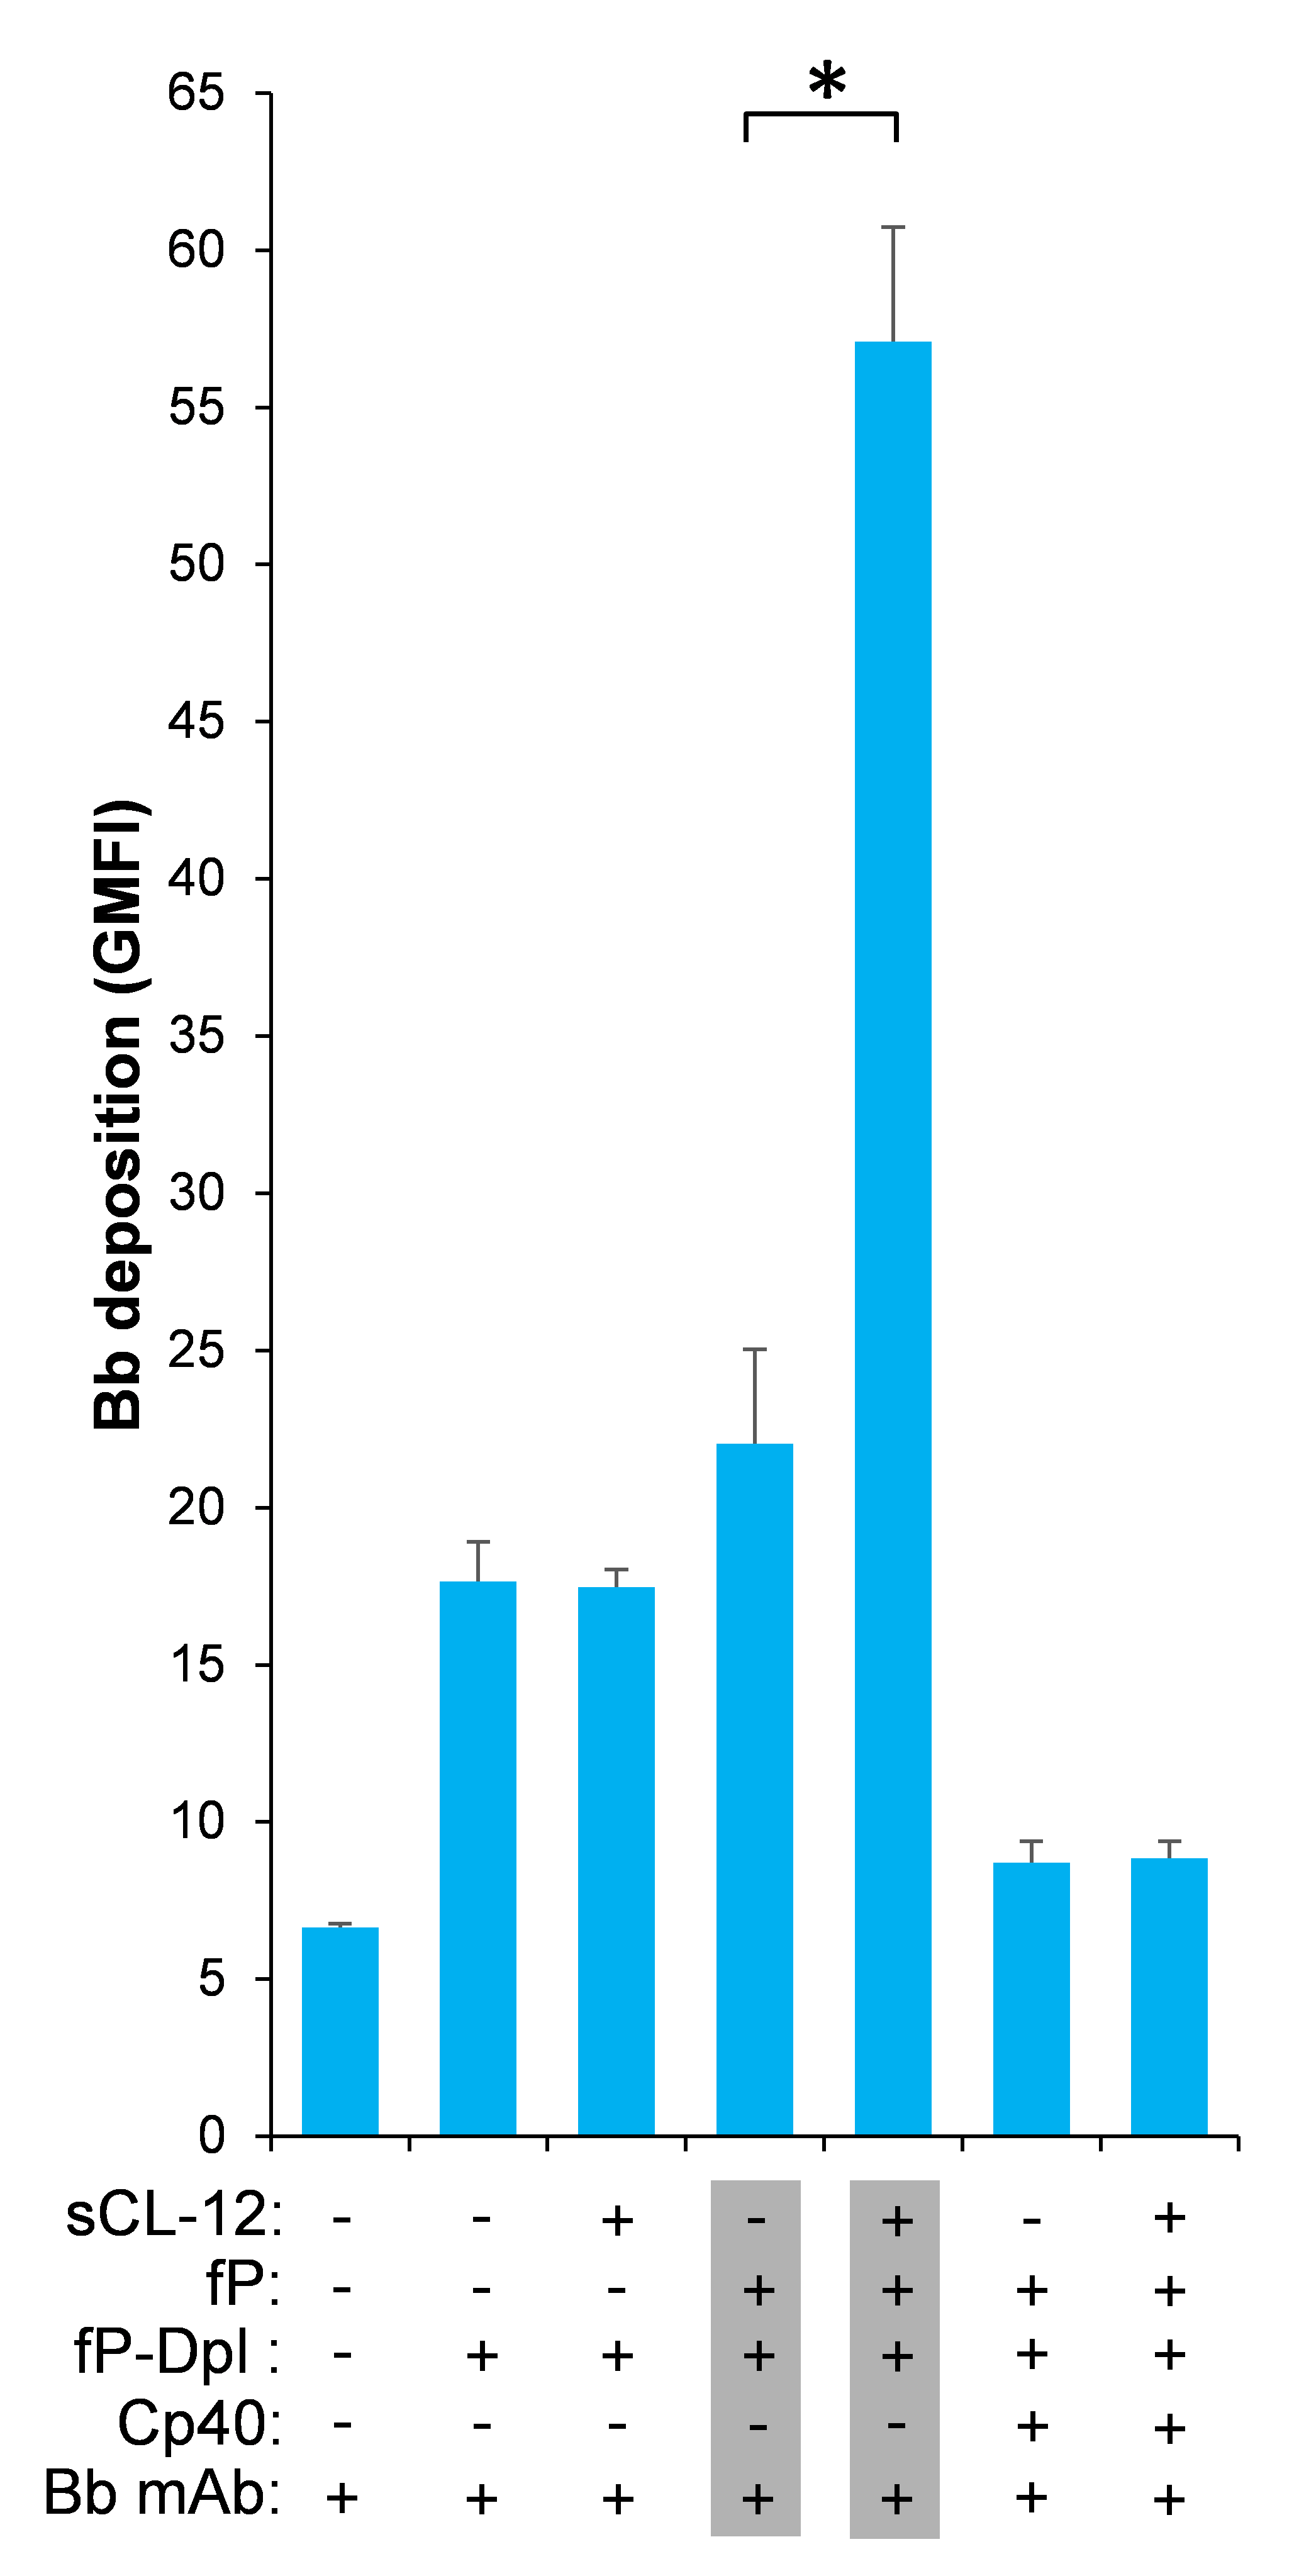

Supplement: supp [file elife-60908-supp-v1.zip › elife_poa_e60908_Figure_6_figure_supplement_1.tif]
